# Supplementary material for: TGF-β induces corneal endothelial senescence via increase of mitochondrial reactive oxygen species in chronic corneal allograft failure
Source: Aging (Albany NY). 2018 Nov 28;10(11):3474–85. doi: 10.18632/aging.101659 (PMC6286827; doi:10.18632/aging.101659)
Supplement: Figure S1 [file aging-10-101659-s001.pdf]

5

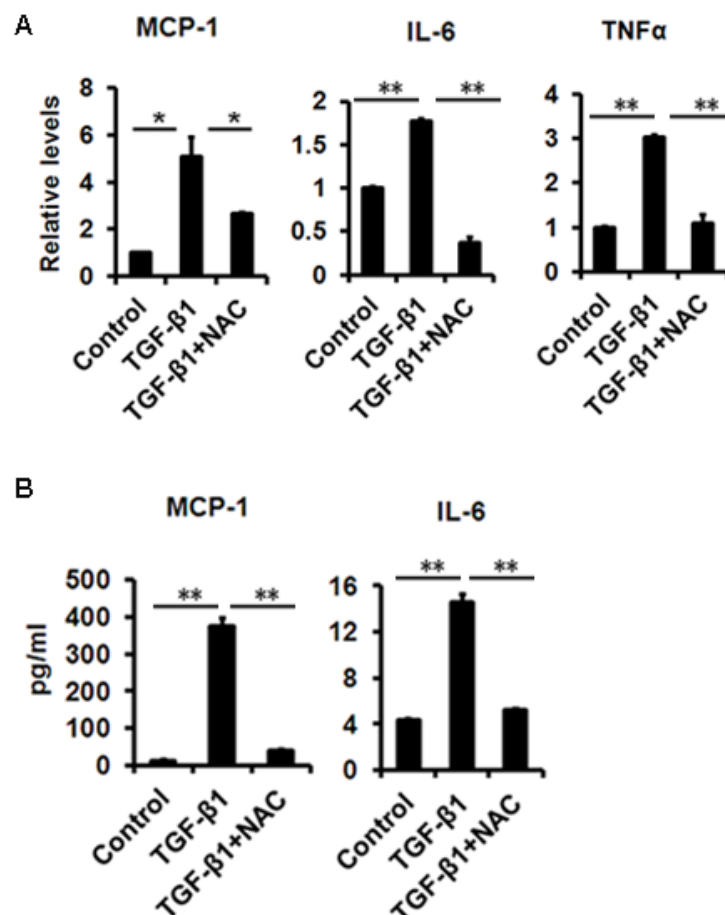

**Figure S1. Effects of TGF- $\beta$ 1 on SASP production.** (A) mRNA expression was measured by RT-qPCR in CE cells upon treatment of 10ng/ml TGF- $\beta$ 1 for 72h. (B) The MCP-1 and IL-6 in cultured CE cells supernatants were detected by ELISA. \* $P$ <0.05, \*\* $P$ <0.01. All the experiments were independently repeated at least three times.
